# Supplementary material for: American Citizens’ Views of an Ideal Pig Farm
Source: MDPI journal article supplement (doi:10.3390/ani7080064), 2017-08-22
Supplement: s1 [file s1]

**IDEAL PIG/PORK FARM SURVEY**  
(Sato et al.)

SINGLE OPEN ENDED QUESTION RANDOMIZED ACROSS PARTICIPANTS

**What do you consider to be an ideal pig farm and why are these characteristics important to you?**

**OR**

**What do you consider to be an ideal pork farm and why are these characteristics important to you?**

FOLLOWUP DEMOGRAPHIC QUESTIONS

**1. Sex**

- ☐ Female
- ☐ Male

**2. How old are you? (open question) \_\_\_\_\_**

**3. Which best describes your level of education?**

- ☐ Some High School
- ☐ High School Graduate or Equivalent
- ☐ Trade or Vocational Degree
- ☐ Some College
- ☐ Associate Degree
- ☐ Bachelor's Degree
- ☐ Graduate or Professional Degree

**4. In which country were you born? \_\_\_\_\_**

**5. In which state do you currently live? \_\_\_\_\_**

**6. Have you lived in the United States for the majority of your life?**

- ☐ Yes
- ☐ No

**7. Which best describes where you have lived most of your life?**

- ☐ Rural
- ☐ Suburban
- ☐ Urban

**8. How many years have you lived with a household pet?**

- ☐ I have never lived with a pet
- ☐ Less than a year
- ☐ 1 - 5 years
- ☐ 5 or more years

**9. Please indicate your familiarity with pig/pork farming.**

- ☐ Not familiar
- ☐ Somewhat familiar
- ☐ Very familiar

**10. Please indicate your involvement in the pig/pork industry.**

- ☐ Farmer
- ☐ Veterinarian
- ☐ Agronomist or Animal Scientist
- ☐ Student or Teacher in Agricultural Science
- ☐ Pig/Pork Industry Professional
- ☐ Animal Advocate
- ☐ Not Involved with Pig/Pork Production
- ☐ Other, please specify: \_\_\_\_\_

**11. Are you vegetarian or vegan?**

- ☐ Yes
- ☐ No
